# Supplementary material
Source: publisher site journal article supplement (https://www.kjim.org/upload/media/kjim-2023-206-Supplementary-4.pdf)
Supplement: Supplementary file 1 [file kjim-2023-206-Supplementary-4.pdf]

## 4. Review and approval

1) Review – clinical practice guideline committee of Korean College of Rheumatology

Recommendations (10-7-2021)

|                 | <u>Details</u>       |                                                                                                                                                                                                                                                                                                                                                                                                                |
|-----------------|----------------------|----------------------------------------------------------------------------------------------------------------------------------------------------------------------------------------------------------------------------------------------------------------------------------------------------------------------------------------------------------------------------------------------------------------|
| <u>Review</u>   | <u>Overall score</u> | <u>81.5%</u>                                                                                                                                                                                                                                                                                                                                                                                                   |
|                 | <u>Comments</u>      | <u>The guidelines were appropriately developed following a sound methodology of evidence-based medicine with participation of the various stakeholders who treat Korean gout patients. The guidelines will be helpful to clinicians, medical students and policymakers. We expect continuous updates of the guidelines incorporating domestic evidences with a proper plan and consensus for the revision.</u> |
| <u>Decision</u> | <u>Revision</u>      |                                                                                                                                                                                                                                                                                                                                                                                                                |

Recommendations (11-02-2021)

1) Revise the recommendation 6 and 8, and change the strength of recommendation accordingly. ('No recommendation' might not be proper).

- 2) It is not clear what recommendation 6 is suggesting.
- 3) Resubmit for review after revision

Recommendations (5-12-2022)

Approved
